# Supplementary material for: Dynamic evolution of bitter taste receptor genes in vertebrates
Source: PubMed Central journal article supplement (PMC2646699; doi:10.1186/1471-2148-9-12), 2009-01-15

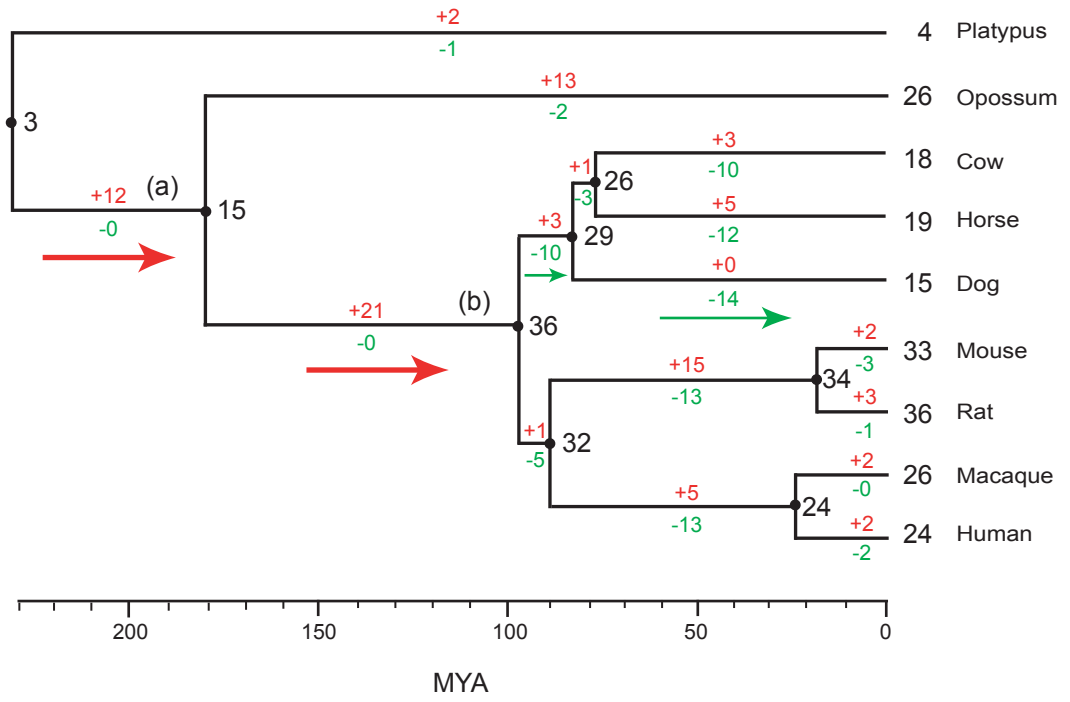

Supplement: 1471-2148-9-12-S2.pdf [file 1471-2148-9-12-S2.pdf]
